# Supplementary material for: Left atrial contraction strain and controlled preload alterations, a study in healthy individuals
Source: Cardiovasc Ultrasound. 2022 Mar 30;20:8. doi: 10.1186/s12947-022-00278-1 (PMC8966341; doi:10.1186/s12947-022-00278-1)
Supplement: Supplementary file 1 — Additional file 1. Individual level data and summary values, analysis dataset. [file 12947_2022_278_MOESM1_ESM.xlsx]

## Sheet: CPAP Left Atria
CPAP LA	Global Longitudinal LA Strain			Systolic LA Strain			LA Area			LA Strain Rate s			LA Strain Rate e			LA Strain Rate a			Doppler Mitralis E			Doppler Mitralis A			Doppler Mitralis DT (E-våg)			Doppler LVOT VTI			Tissue Doppler e (LV lateral wall)			Tissue Doppler a (LV lateral wall)			Tissue Doppler s (LV lateral wall)			Tissue doppler s (RV free wall)			E/A			E/e			Hjärtfrekvens
LegLift ICU	GLS LA Peter			Systolic LA strain			LA-Area PG			LA SR s			LA SR e			LA SR a			LV-E			LV A			LV Mitralis DT (E-våg)			LVOT-VTI			LV e			LV a			LV s			RV s			VK E/A			VK E/e			Hjärtfrekvens
	Baseline	During		Baseline	During		Baseline	During		Baseline	During		Baseline	During		Baseline	During		Baseline	During		Baseline	During		Baseline	During		Baseline	During		Baseline	During		Baseline	During		Baseline	During		Baseline	During		Baseline	During		Baseline	During		Baseline
n=	22	23		23	23		21	16		23	23		23	23		23	23		25	22		24	20		25	20		24	20		25	23		25	24		25	23		25	25		23	19		24	20		27
mean	41.1818	35.3783		11.587	12.8174		16.3952	13.9313		1.75609	1.52957		-2.5913	-2.21522		-1.68043	-1.76739		0.8272	0.698636		0.4	0.4015		195.6	185.2		23.525	18.605		0.1416	0.114348		0.0584	0.0516667		0.094	0.0869565		0.1124	0.09		2.12845	1.78832		6.02291	6.29502		60.1852
SD	6.70164	5.18319		3.47645	4.21649		2.80312	2.93251		0.314697	0.367874		0.448394	0.522545		0.357942	0.494885		0.136489	0.0994411		0.0790157	0.0995397		36.5946	39.435		3.87189	4.20745		0.0230362	0.0265991		0.0149108	0.00963087		0.0193649	0.0200986		0.0200582	0.0168325		0.553117	0.439045		1.41086	2.40624		7.31193
SEM	1.4288	1.08077		0.724891	0.879199		0.611691	0.733128		0.0656188	0.0767071		0.0934966	0.108958		0.0746361	0.103191		0.0272979	0.0212009		0.016129	0.0222578		7.31893	8.81792		0.790346	0.940814		0.00460724	0.00554629		0.00298217	0.00196589		0.00387298	0.00419084		0.00401165	0.0033665		0.115333	0.100724		0.287991	0.538051		1.40718
95%CI	2.97134	2.24138		1.50333	1.82335		1.27596	1.56263		0.136085	0.159081		0.1939	0.225965		0.154786	0.214004		0.05634	0.0440897		0.0333654	0.046586		15.1055	18.4561		1.63496	1.96915		0.00950888	0.0115023		0.00615489	0.00406676		0.00799344	0.00869127		0.00827964	0.00694812		0.239186	0.211613		0.595754	1.12615		2.8925
min	31.5	27.5		5.5	6.1		12.1	7.7		1.2	1		-3.5	-3.4		-2.4	-3		0.62	0.52		0.3	0.25		134	108		16	10.9		0.09	0.06		0.04	0.03		0.04	0.04		0.08	0.06		1.5098	1.16667		3.70588	0		41
max	58	45		19	19.6		21.7	20.7		2.4	2.45		-1.7	-1.1		-1.1	-1		1.05	0.91		0.64	0.66		284	245		33.8	27.2		0.18	0.16		0.09	0.07		0.12	0.12		0.15	0.12		3.28125	2.70968		10.3	12.5		73
T-Test	0.000465599			0.156951			0.0124962			0.0182711			0.00130047			0.292258			3.76716e-08			0.0788799			0.338682			2.48089e-05			1.49198e-07			0.0040684			0.0206257			3.57147e-07			0.0296575			0.664346			0.0285451
	Baseline	During		Baseline	During		Baseline	During		Baseline	During		Baseline	During		Baseline	During		Baseline	During		Baseline	During		Baseline	During		Baseline	During		Baseline	During		Baseline	During		Baseline	During		Baseline	During		Baseline	During		Baseline	During		Baseline
	Peter	Peter		Peter	Peter		Peter	Peter		Peter	Peter		Peter	Peter		Peter	Peter		Peter	Peter		Peter	Peter		Peter	Peter		Peter	Peter		Peter	Peter		Peter	Peter		Peter	Peter		Peter	Peter		Peter	Peter		Peter	Peter
	31.5	32		7.5	7		20.8	20.7		1.95	1		-2.1	-2.4		-1.4	-1		0.9	0.82		0.3	0.32		167	125		saknas	saknas		0.18	0.16		0.05	0.04		0.1	0.1		0.12	0.11		3	2.5625		5	5.125		49
	42.6	43.3		10.3	19.6		15.9	dålig bild		2.1	2.3		-2.5	-2.5		-1.3	-1.4		0.79			0.32			154			26	15, fråga lucy		0.14	0.14		0.06	0.05		0.11	0.08		0.14	0.11		2.46875			5.64286	0		52
5																																																	60
6																																																	61
7	54 eller 44,5	39		17	18		16.7	13.4		1.64	1.2		-1.7	-2.1		-2.2	-2.2		0.63	0.58		0.41	0.45		205	153		25.2	20		0.1	0.09		0.05	0.05		0.1	0.08		0.11	0.1		1.53659	1.28889		6.3			53
8	43,3 eller 38,1	28.1		9.5	15		17.4	Dålig bild		1.5	1.4		-2.9	-1.85		-1.4	-1.95		0.95	0.79		0.31	DB		208	166		28.2	20.1		0.15	0.14		0.04	0.03		0.07	0.07		0.09	0.08		3.06452			6.33333	5.64286		54
9	33.5	31.9		8	10.6					1.6	1.6		-2.7	-1.8		-1.1	-1.5		0.74	0.69		0.4	0.35		183	188		16.1	15.3		0.09	0.08		0.04	0.04		0.04	0.04		0.09	0.07		1.85	1.97143		8.22222	8.625		58
10
11	42	35		19	19					2.4	1.43		-1.85	-1.5		-2.4	-3		1.03	0.75		0.64	0.56		192	245		22.1	19.1		0.1	0.06		0.06	0.06		0.11	0.09		0.1	0.07		1.60938	1.33929		10.3	12.5		64
12	45	36.7		10.7	13.8		14	7.7		1.8	2.45		-3.5	-3.4		-1.7	-1.9		0.73	0.52		0.35	0.25		155	207		19.2	16.4		0.14	0.11		0.04	0.04		0.07	0.06		0.08	0.06								66
13																			1.03	0.84		0.36	0.31		223	175		20.4	19.3		0.15	0.12		0.07	0.06		0.12	0.11		0.12	0.09		2.86111	2.70968		6.86667	7		55
14	58	Dålig bild					17.9	11.1			Dålig bild								0.63	0.53		0.31	0.34		203			22.8	dålig bild		0.17	0.1		0.09	0.05		0.12	0.08		0.15	0.1		2.03226	1.55882		3.70588	5.3		62
15
16
17	36	29		10.8	8		16.6	dålig bild		1.4	1.75		-2.5	-2		-1.45	-1.1		0.87	0.62		0.39	0.41		138			25.6	22		0.14	0.08		0.06	0.05		0.1	0.09		0.13	0.08		2.23077	1.5122		6.21429	7.75		66
18	44	32.7		14.4	11.9		14.4	12		2.2	1.8		-2.1	-1.6		-1.8	-1.7		0.81	0.66		0.48	0.37		151	108		22	14.4		0.13	0.09		0.08	0.06		0.11	0.12		0.1	0.09		1.6875	1.78378		6.23077	7.33333		69
19	47.2	39		10.5	8.5		18.2	14.2		2	1.2		-2.6	-2.2		-1.6	-1.4		0.64	dålig bild		0.39	dålig bild		239	dålig bild		22	dålig bild		0.13	dålig bild		0.04	dålig bild		0.09	dålig bild		0.15	0.12		1.64103			4.92308			60
20
21
22
23	40	31		15.1	10		12.3	15.8		1.5	1.1		-2.6	-2.5		-2.2	-1.3		0.78	0.69		0.45	0.34		201	228		25	20.4		0.15	0.14		0.06	0.06		0.1	0.1		0.09	0.1		1.73333	2.02941		5.2	4.92857		65
24	35.6	32.3		11.2	9.3		18.3	dålig bild		1.8	1.35		-2.1	-1.7		-1.4	-1.3		0.99	0.76		0.42	0.4		236	170		20.6	17.1		0.15	dålig bild		0.05	0.05		0.09	0.06		0.1	0.08		2.35714	1.9		6.6			57
25	35.6	36.1		5.6	12.7		16	13.9		1.2	1.1		-3	-2.2		-1.25	-1.7		0.77	0.68		0.42	0.29		181	237		33.8	20.2		0.14	0.11		0.04	0.04		0.07	0.07		0.09	0.07		1.83333	2.34483		5.5	6.18182		41
26	41.6	27.5		12.9	11.7		20.8	15.9		2	1.25		-2.9	-2.6		-1.8	-2		0.77	0.64		0.51	0.49		209	224		24	10.9		0.18	0.15		0.09	0.07		0.11	0.1		0.1	0.1		1.5098	1.30612		4.27778	4.26667		71
27	34.5	38.7		9.6	19		18.9	dålig bild		1.6	1.6		-2.8	-1.1		-1.9	-2.1		0.72	0.58		0.44	0.3		179	161		16	11.2		0.12	0.09		0.07	0.05		0.08	0.08		0.1	0.07		1.63636	1.93333		6	6.44444		69
28	41	41		8.3	11.9		12.1	12.6		1.4	1.2		-3	-3		-1.1	-1.6		0.78	0.73		0.3	dålig bild		203	187		27.1	22.5		0.16	0.12		0.05	0.05		0.09	0.08		0.1	0.08		2.6			4.875	6.08333		51
29
30	42.7	32.6		11.3	6.5					1.9	1.7		-2.7	-2		-1.4	-1		1.05	0.71		0.32	0.37		175	124		23.8	11.6		0.16	0.13		0.06	0.06		0.11	0.11		0.13	0.1		3.28125	1.91892		6.5625	5.46154		62
31	44.1	44		14.9	17.5		12.4	16.1		1.75	1.8		-2.55	-2.9		-1.9	-2.4		0.81	0.7		0.47	0.44		204	219		21.4	20.3		0.12	0.11		0.05	0.05		0.09	dålig bild		0.13	0.09		1.7234	1.59091		6.75	6.36364		62
32	32.5	30		5.5	6.1		14.3	11.6		1.35	1.4		-2.7	-2.1		-1.75	-1.6		0.74	0.64		0.45	0.47		284	190		25.1	20.9		0.16	0.13		0.05	0.05		0.1	0.1		0.11	0.09		1.64444	1.3617		4.625	4.92308		65
33
34	53	45		15.5	13		13.8	12.2		1.6	1.5		-3.4	-2.8		-1.8	-2.1		0.96	0.91		0.41	0.43		134	165		28.4	27.2		0.15	0.14		0.06	0.06		0.09	0.1		0.1	0.11		2.34146	2.11628		6.4	6.5		55
35	40.5	41		12.5	16		15.3	13.8		2.2	1.7		-2.1	-2.3		-1.9	-2.2		0.93	0.77		dålig bild	0.66		234	203		22.7	dålig bild		0.13	0.08		0.06	0.05		0.09	0.07		0.12	0.09			1.16667		7.15385	9.625		63
36
37
38	36.2	32.8		14	16.7		16.5	15		1.5	1.9		-2.6	-2.2		-2.1	-1.9		0.62	saknas		0.36	saknas		253	saknas		22.7	21.7		0.15	0.13		0.08	0.05		0.12	0.12		0.12	0.07		1.72222			4.13333			62
39	48.9	35		12.4	13		21.7	16.9		2	1.45		-2.7	-2.2		-1.8	-2.3		1.01	0.76		0.39	0.48		179	229		24.4	21.5		0.15	0.13		0.06	0.07		0.07	0.09		0.14	0.12		2.58974	1.58333		6.73333	5.84615		73
40
[truncated: 1 more columns]

## Sheet: CPAP Left Ventricle
CPAP Left Ventricle	Global Longitudinal LV Strain			Diastolic LV Strain			LV volume, enddiastolic volume (obs biplan ej analyserad, bara 4kammare)			LV Strain Rate s			LV Strain Rate e			LV Strain Rate a			LV Ejection Fraction			Doppler Mitralis E			Doppler Mitralis A			Doppler Mitralis DT (E-våg)			Doppler LVOT VTI			Tissue Doppler e (LV lateral wall)			Tissue Doppler a (LV lateral wall)			Tissue Doppler s (LV lateral wall)			Tissue doppler s (RV free wall)			E/A			E/e
LegLift ICU	GLS LV Peter			Diastolic LV strain			LV-Volume PG			LV SR s			LV SR e			LV SR a			LV EF			LV-E			LV A			LV Mitralis DT (E-våg)			LVOT-VTI			LV e			LV a			LV s			RV s			LV E/A			LV E/e
	Baseline	During		Baseline	During		Baseline	During		Baseline	During		Baseline	During		Baseline	During		Baseline	During		Baseline	During		Baseline	During		Baseline	During		Baseline	During		Baseline	During		Baseline	During		Baseline	During		Baseline	During		Baseline	During		Baseline
n=	29	27		28	27		33	32		28	27		28	27		28	27		33	32		34	30		33	27		34	27		33	27		35	32		35	33		36	34		35	35		32	26		34
mean	-19.3793	-18.1519		-3.91643	-3.28704		105.152	88.0938		-0.9975	-1.00963		1.595	1.45185		0.527143	0.542593		54.9091	54.25		0.798824	0.666333		0.388182	0.382963		198.294	184.741		22.7545	17.9704		0.142	0.112188		0.058	0.0524242		0.0941667	0.0858824		0.108857	0.0871429		2.1265	1.80855		5.55167
SD	1.97238	2.7461		1.34495	2.48145		19.655	22.8054		0.141333	0.182872		0.262389	0.39843		0.11709	0.172796		4.97094	5.67962		0.135998	0.114304		0.0776392	0.0968669		37.9837	47.2584		3.68986	4.4648		0.0229834	0.026849		0.0138903	0.0106155		0.0196214	0.0189285		0.0205471	0.0167282		0.586773	0.492026		1.64615
SEM	0.366261	0.528487		0.254172	0.477556		3.4215	4.03147		0.0267094	0.0351937		0.0495869	0.0766779		0.0221279	0.0332546		0.865329	1.00402		0.0233235	0.020869		0.0135152	0.018642		6.51415	9.09488		0.642322	0.859252		0.0038849	0.00474627		0.00234789	0.00184793		0.00327024	0.00324621		0.0034731	0.00282758		0.103728	0.0964943		0.282313
95%CI	0.750252	1.08632		0.521517	0.981631		6.96937	8.22223		0.0548032	0.0723418		0.101744	0.157614		0.0454027	0.0683558		1.76262	2.04772		0.0474521	0.0426818		0.0275297	0.0383193		13.2531	18.6948		1.30837	1.76622		0.00789506	0.00968008		0.00477149	0.0037641		0.00663893	0.00660447		0.00705819	0.00574633		0.211554	0.198734		0.574369
min	-22.6	-22.9		-5	-6.1		79	47		-1.2	-1.35		1	0.7		0.35	0.25		41	44		0.56	0.42		0.22	0.21		134	68		16	8.5		0.09	0.06		0.04	0.03		0.04	0.04		0.06	0.06		1.5	1.16667		0
max	-14.4	-12.4		2	6.1		156	137		-0.7	-0.72		2.1	2.4		0.8	0.85		63	67		1.05	0.91		0.64	0.66		286	275		33.8	27.2		0.18	0.16		0.09	0.07		0.13	0.12		0.15	0.12		3.72727	3.04762		10.3
T-Test	0.00094919			0.198563			2.54937e-05			0.674131			0.0749088			0.531337			0.571633			1.96276e-10			0.0377608			0.195538			2.53365e-06			8.56058e-09			0.00247792			0.00639517			3.89079e-08			0.00760071			0.0193211
	Baseline	During		Baseline	During		Baseline	During		Baseline	During		Baseline	During		Baseline	During		Baseline	During		Baseline	During		Baseline	During		Baseline	During		Baseline	During		Baseline	During		Baseline	During		Baseline	During		Baseline	During		Baseline	During		Baseline
	Peter	Peter		Peter	Peter		Peter	Peter		Peter	Peter		Peter	Peter		Peter	Peter		Peter	Peter		Peter	Peter		Peter	Peter		Peter	Peter		Peter	Peter		Peter	Peter		Peter	Peter		Peter	Peter		Peter	Peter		Peter	Peter		Peter
	-19.7	-18.6		-4.8	-2.5		93	108		-1.16	-0.92		1.5	1.05		0.56	0.35		54	54		0.9	0.82		0.3	0.32		167	125		saknas	saknas		0.18	0.16		0.05	0.04		0.1	0.1		0.12	0.11		3	2.5625		5
	-20.2	-18		-3.6	-3.75		156	137		-1	-1.1		1.6	0.8		0.4	0.7		52	51		0.79			0.32			154			26	15, fråga lucy		0.14	0.14		0.06	0.05		0.11	0.08		0.14	0.11		2.46875			5.64286
5							118	96											49	60														0.1			0.05			0.08	0.07		0.1	0.09					0
6				2	2.3		109	68		-0.92	-0.72		1.71	1.1		0.36	0.32		55	46		0.72	0.62		0.44	0.39		160	149		19.5	22.6		0.17	0.07		0.05	0.04		0.07	0.06		0.09	0.06		1.63636	1.58974		4.23529
7	-20.5	-19.4		-4.9	-4.4		126	77		-0.8	-1.3		1.3	1.75		0.6	0.65		54	50		0.63	0.58		0.41	0.45		205	153		25.2	20		0.1	0.09		0.05	0.05		0.1	0.08		0.11	0.1		1.53659	1.28889		6.3
8	-17.6	-14.9		-5	-3		136	137		-0.8	-0.76		1.3	1.4		0.7	0.3		56	49		0.95	0.79		0.31	DB		208	166		28.2	20.1		0.15	0.14		0.04	0.03		0.07	0.07		0.09	0.08		3.06452			6.33333
9	-18.9	-20.2		-5	6.1		119	80		-0.8	-0.9		1	1.4		0.7	0.8		45	55		0.74	0.69		0.4	0.35		183	188		16.1	15.3		0.09	0.08		0.04	0.04		0.04	0.04		0.09	0.07		1.85	1.97143		8.22222
10	-15	-13.6					125	108											41	49																				0.09	0.06
11	-21.4	-17.3		-3.2	-2.7		89	71		-1.1	-1.05		1.45	1.5		0.74	0.73		63	67		1.03	0.75		0.64	0.56		192	245		22.1	19.1		0.1	0.06		0.06	0.06		0.11	0.09		0.1	0.07		1.60938	1.33929		10.3
12	-14.4	-13.9		-3.1	-2.8		110	86		-0.7	-0.84		1.5	1.5		0.4	0.45		45	56		0.73	0.52		0.35	0.25		155	207		19.2	16.4		0.14	0.11		0.04	0.04		0.07	0.06		0.08	0.06
13	-20.4	-22																				1.03	0.84		0.36	0.31		223	175		20.4	19.3		0.15	0.12		0.07	0.06		0.12	0.11		0.12	0.09		2.86111	2.70968		6.86667
14	-19.4			-4.8			94	103		-1.1	Dålig bild		1.6			0.6			59	60		0.63	0.53		0.31	0.34		203			22.8	dålig bild		0.17	0.1		0.09	0.05		0.12	0.08		0.15	0.1		2.03226	1.55882		3.70588
15
16
17	-20.5			-3.4	-3		86	73		-1.2	-1.2		2	1.5		0.45	0.35		54	54		0.87	0.62		0.39	0.41		138			25.6	22		0.14	0.08		0.06	0.05		0.1	0.09		0.13	0.08		2.23077	1.5122		6.21429
18	-20.8	-20.4		-3.6	-5		79	65		-0.9	-1.35		1.25	1.4		0.4	0.65		59	53		0.81	0.66		0.48	0.37		151	108		22	14.4		0.13	0.09		0.08	0.06		0.11	0.12		0.1	0.09		1.6875	1.78378		6.23077
19	-18.9	-18.2		-3.6	-4.5		119	129		-0.9	-0.83		1.65	1.4		0.5	0.6		53	44		0.64	dålig bild		0.39	dålig bild		239	dålig bild		22	dålig bild		0.13	dålig bild		0.04	dålig bild		0.09	dålig bild		0.15	0.12		1.64103			4.92308
20	-19.9	-18.9		-4.4	-6.1		82	Dålig bild		-1	-1.24		1.6	1.45		0.8	0.85		56	Dålig bild		0.75	0.52		0.42	dålig bild		150	dålig bild		20.6	8.5		0.16	0.08		0.07	0.07		0.13	0.1		0.11	0.07		1.78571			4.6875
21	-15.8	-12.4																				0.72	0.75		0.33	0.3		189	174		18.8	15.7		0.12	0.1		0.05	0.07		0.07	0.1		0.06	0.07		2.18182	2.5		6
22	-18.3	-16.3					82	60											57	52		0.63	0.45		0.42	0.32		209	68		18.2	16.7		0.12	0.11		0.08	0.07		0.08	0.08		0.1	0.08		1.5	1.40625		5.25
23	-21.9	-21.2		-4.2	-5		87	68		-1.2	-1.2		2	2.1		0.5	0.7		56	51		0.78	0.69		0.45	0.34		201	228		25	20.4		0.15	0.14		0.06	0.06		0.1	0.1		0.09	0.1		1.73333	2.02941		5.2
24	-18.3	-15.7		-4.16	-4.2		117	47		-0.9	-1		1.4	1.6		0.5	0.6		57	60		0.99	0.76		0.42	0.4		236	170		20.6	17.1		0.15	dålig bild		0.05	0.05		0.09	0.06		0.1	0.08		2.35714	1.9		6.6
25	-21.8	-17.7		-4.7	-2.8		102	79		-0.95	-1		2	2.1		0.55	0.4		56	58		0.77	0.68		0.42	0.29		181	237		33.8	20.2		0.14	0.11		0.04	0.04		0.07	0.07		0.09	0.07		1.83333	2.34483		5.5
26	-19.4	-17.6		-2.8	-4.4		122	108		-1.2	-1.2		1.6	1.2		0.45	0.5		54	56		0.77	0.64		0.51	0.49		209	224		24	10.9		0.18	0.15		0.09	0.07		0.11	0.1		0.1	0.1		1.5098	1.30612		4.27778
27	-19.2	-20		-4.5	-5.2		144	81		-0.9	-1.2		1.4	1		0.5	0.6		58	64		0.72	0.58		0.44	0.3		179	161		16	11.2		0.12	0.09		0.07	0.05		0.08	0.08		0.1	0.07		1.63636	1.93333		6
28	-18.3	-16.7		-3.1	-2.7		84	76		-0.85	-0.85		1.6	1.5		0.4	0.4		58	52		0.78	0.73		0.3	dålig bild		203	187		27.1	22.5		0.16	0.12		0.05	0.05		0.09	0.08		0.1	0.08		2.6			4.875
29	-20.3	-18.8					93	92											52	61		0.91	0.65		0.35	0.43		231	275		23.1	19.9		0.16	0.11		0.06	0.06		0.11	0.1		0.13	0.1		2.6	1.51163		5.6875
30	-22.1	-22.9		-4.7	-5.3					-1.2	-1.2		2.1	2.4		0.6	0.5					1.05	0.71		0.32	0.37		175	124		23.8	11.6		0.16	0.13		0.06	0.06		0.11	0.11		0.13	0.1		3.28125	1.91892		6.5625
31	-22.6	-21.6		-4.8	-4.7		89	81		-1.2	-1.1		1.7	1.6		0.6	0.7		63	59		0.81	0.7		0.47	0.44		204	219		21.4	20.3		0.12	0.11		0.05	0.05		0.09	dålig bild		0.13	0.09		1.7234	1.59091		6.75
32	-18.4	-14.2		-4	-3.3		104	104		-1.05	-0.8		1.7	0.9		0.5	0.4		49	47		0.74	0.64		0.45	0.47		284	190		25.1	20.9		0.16	0.13		0.05	0.05		0.1	0.1		0.11	0.09		1.64444	1.3617		4.625
33	-18.5	-19.8					93	75											60	53		0.82	0.64		0.22	0.21		247	256		20.3	dålig bild		0.17	0.16		0.04	0.04		0.09	0.08		0.1	0.09		3.72727	3.04762		4.82353
34	-20.6	-21		-5	-5		101	98		-1	-1		1.6	1.8		0.6	0.6		57	56		0.96	0.91		0.41	0.43		134	165		28.4	27.2		0.15	0.14		0.06	0.06		0.09	0.1		0.1	0.11		2.34146	2.11628		6.4
35	-18.9	-18.8		-3.9	-3.9		89	83		-1	-0.9		1.5	1.9		0.5	0.6		55	53		0.93	0.77		dålig bild	0.66		234	203		22.7	dålig bild		0.13	0.08		0.06	0.05		0.09	0.07		0.12	0.09			1.16667		7.15385
36							89	48											51	47		0.56	0.42		0.33	0.32		187	192		21.3	10.8		0.15	0.12		0.05	0.04		0.1	0.08		0.12	0.06		1.69697	1.3125		3.73333
37				-3.4	-2		120	78		-1.1	-0.8		1.5	0.7		0.4	0.3		58	44		0.73	dålig bild		0.32	dålig bild		286	dålig bild		25.1	18.9		0.15	0.13		0.06	0.05		0.13	0.08		0.08	0.1		2.28125			4.86667
38				-3.7	-1.9		83	86		-1	-0.9		1.8	1.45		0.35	0.25		56	56		0.62	saknas		0.36	saknas		253	saknas		22.7	21.7		0.15	0.13		0.08	0.05		0.12	0.12		0.12	0.07		1.72222			4.13333
39				-4.6	-5		119	119		-1	-1.1		2	1.2		0.6	0.8		61	59		1.01	0.76		0.39	0.48		179	229		24.4	21.5		0.15	0.13		0.06	0.07		0.07	0.09		0.14	0.12		2.58974	1.58333		6.73333
40				-4.7	-4		111	98		-1	-0.8		1.3	1.5		0.5	0.55		59	60		0.64	0.57		0.38	0.34		193	170		19.4	dålig bild		0.13	0.08		0.06	0.05		0.09	0.11		0.11	0.08		1.68421	1.67647		4.92308
[truncated: 3 more columns]

## Sheet: Passive Leg Raise Left Atria
Passive Leg Raise, Left Atria	Global Longitudinal LA Strain			Systolic LA Strain			LA Area			LA Strain Rate s			LA Strain Rate e			LA Strain Rate a			Doppler Mitralis E			Doppler Mitralis A			Doppler Mitralis DT (E-våg)			Doppler LVOT VTI			Tissue Doppler e (LV lateral wall)			Tissue Doppler a (LV lateral wall)			Tissue Doppler s (LV lateral wall)			Tissue doppler s (RV free wall)			E/A			E/e			Hjärtfrekvens
LegLift ICU	GLS LA Peter			Systolic LA strain			LA-Area PG			LA SR s			LA SR e			LA SR a			LV-E			LV A			LV Mitralis DT (E-våg)			LVOT-VTI			LV e			LV a			LV s			RV s			VK E/A			VK E/e			Hjärtfrekvens
	Baseline	During		Baseline	During		Baseline	During		Baseline	During		Baseline	During		Baseline	During		Baseline	During		Baseline	During		Baseline	During		Baseline	During		Baseline	During		Baseline	During		Baseline	During		Baseline	During		Baseline	During		Baseline	During		Baseline
n=	26	26		26	26		22	22		26	26		26	26		26	26		26	26		26	26		26	26		26	26		25	25		25	25		24	24		25	25		26	26		25	25		27
mean	37.4354	41.625		10.2346	11.0077		14.9	16.3636		1.48885	1.70192		-2.57308	-2.66731		-1.53077	-1.62962		0.788077	0.79		0.39	0.385385		202.231	196.385		21.0962	22.5731		0.1432	0.1508		0.0528	0.058		0.0891667	0.09375		0.1004	0.0996		2.07976	2.11803		5.6699	5.35225		59.2963
SD	4.10955	5.46094		2.71764	3.73384		3.31591	2.70846		0.281145	0.303473		0.481712	0.504766		0.34061	0.357832		0.123839	0.114717		0.0674685	0.0820356		40.9334	39.3488		3.44935	2.87869		0.025285	0.0199833		0.0113725	0.011547		0.0171735	0.0143898		0.0142829	0.012741		0.509319	0.486069		1.14801	0.930954		8.70373
SEM	0.805949	1.07098		0.532973	0.732266		0.706954	0.577446		0.0551371	0.059516		0.0944714	0.0989927		0.0667992	0.0701767		0.0242869	0.0224979		0.0132317	0.0160885		8.0277	7.71693		0.676472	0.564557		0.00505701	0.00399667		0.0022745	0.0023094		0.00350552	0.0029373		0.00285657	0.0025482		0.0998858	0.095326		0.229601	0.186191		1.67503
95%CI	1.65988	2.20572		1.09768	1.50813		1.47019	1.20086		0.113557	0.122576		0.194568	0.203879		0.137575	0.144532		0.0500197	0.0463352		0.0272511	0.0331349		16.5334	15.8933		1.39322	1.16273		0.0104372	0.00824871		0.00469433	0.00476637		0.00725171	0.00607626		0.00589567	0.00525923		0.205719	0.196327		0.473874	0.384279		3.44308
min	31.5	31.25		6.9	5		9.5	12.5		1	1.15		-3.3	-3.5		-2.3	-2.3		0.59	0.6		0.3	0.28		140	147		15.8	16.6		0.1	0.11		0.03	0.04		0.06	0.07		0.07	0.07		1.47273	1.50847		3.9375	3.7		42
max	45.5	52		17	18.7		22.7	22.4		2	2.4		-1.5	-1.55		-1.1	-1		1.06	1.04		0.55	0.59		296	327		28.9	30.8		0.21	0.2		0.08	0.08		0.12	0.12		0.14	0.12		3.33333	3.58621		8.33333	7.5		73
T-Test	0.0023533			0.313441			0.00714102			0.0111217			0.493065			0.28016			0.907161			0.776959			0.550911			0.00121625			0.124237			0.0202509			0.0456105			0.722935			0.708409			0.0838908			0.961855
	Baseline	During		Baseline	During		Baseline	During		Baseline	During		Baseline	During		Baseline	During		Baseline	During		Baseline	During		Baseline	During		Baseline	During		Baseline	During		Baseline	During		Baseline	During		Baseline	During		Baseline	During		Baseline	During		Baseline
	Peter	Peter		Peter	Peter		Peter	Peter		Peter	Peter		Peter	Peter		Peter	Peter		Peter	Peter		Peter	Peter		Peter	Peter		Peter	Peter		Peter	Peter		Peter	Peter		Peter	Peter		Peter	Peter		Peter	Peter		Peter	Peter
3	39.8	31.5		5.7	7					1.38	1.31		-2.6	-2.5		-0.92	-1.2		0.95	0.88		0.51	0.33		148	198		17.6	20		0.19	0.18		0.05	0.05		0.11	0.11		0.1	0.1		1.86275	2.66667		5	4.88889		47
4	45	44		17	13.5		17.4	15.8		1.7	2.2		-2.5	-2.4		-1.3	-2.1		0.9	0.62		0.31	0.34		150	150		19	25		0.16	0.13		0.07	0.06		0.11	0.11		0.1	0.1		2.90323	1.82353		5.625	4.76923		52
5
6	33	40.4		6.9	10.6		16	16.4		1.4	1.7		-2.4	-2.45		-1.3	-1.77		0.73	0.73		0.32	0.32		209	209		24.7	22.9		0.15	0.15		0.05	0.05		0.09	0.08		0.1	0.09		2.28125	2.28125		4.86667	4.86667		61
7	51 eller 45 bild 2	52		15	10.6					1.3	2.4		-1.8	-2.6		-1.9	-1.8		0.64	0.63		0.38	0.36		228	249		16.2	20.4														1.68421	1.75					49
8	38	43.8		7.9	9.6		17.2	18.6		1.26	1.6		-2.35	-3		-1.45	-1.65		1.06	1.04		0.42	0.29		192	162		24.4	25.1		0.16	0.16		0.04	0.05		0.08	0.09		0.09	0.09		2.52381	3.58621		6.625	6.5		46
9
10
11
12	36	43.5		13.7	9		15.6	12.5		1.46	1.3		-2.75	-1.7		-2.3	-1.3																				0.07	0.08											62
13
14	33.5	31.25		6.9	6.9					1.5	1.15		-2.45	-2		-1.1	-1.1		0.69	0.76		0.39	0.36		182	200		17.3	19.7		0.16	0.16		0.07	0.06					0.11	0.09		1.76923	2.11111		4.3125	4.75		54
15
16
17	42	40.9		7.5	16.5		13.5	15.7		2	1.8		-3.1	-2.2		-1.2	-1.9		0.91	0.93		0.3	0.39		180	173		24.3	24.3		0.17	0.16		0.05	0.07		0.08	0.09		0.11	0.12		3.03333	2.38462		5.35294	5.8125		66
18	35	42		11.3	5.8		11.3	17		1.7	1.4		-2.2	-2.75		-1.8	-1		0.81	0.8		0.55	0.5		162	218		22.7	22.8		0.11	0.15		0.07	0.08					0.08	0.07		1.47273	1.6		7.36364	5.33333		70
19	42.1	42		10.7	14.5		14	14.8		1.6	1.5		-3.3	-2.9		-1.9	-1.9		0.59	0.6		0.36	0.35		296	229		20	21		0.12	0.15		0.06	0.06		0.1	0.12		0.11	0.12		1.63889	1.71429		4.91667	4		62
20	35	35		13	17		15.7	16.1		1.85	1.6		-3.1	-2		-2	-2		0.74	0.8		0.36	0.4		197	202		21.4	20.5		0.14	0.14		0.08	0.08		0.12	0.12		0.11	0.1		2.05556	2		5.28571	5.71429		71
21
22
23	37	40.3		8.4	8		12.5	13.3		1.74	1.6		-2	-3.1		-1.1	-1.25		0.89	0.83		0.38	0.33		274	250		22.2	25.8		0.21	0.17		0.05	0.06		0.09	0.1		0.09	0.09		2.34211	2.51515		4.2381	4.88235		55
24	43.3	49.2		14.4	18.7		9.5	12.6		1.85	2.1		-2.4	-1.55		-2	-2.2		1	0.91		0.3	0.49		185	223		22	22.7		0.12	0.14		0.06	0.05		0.08	0.09		0.1	0.1		3.33333	1.85714		8.33333	6.5		55
25	33.2	50		8.4	14.2		16.6	17.8		1	1.8		-2.9	-2.9		-1.1	-1.5		0.83	0.77		0.47	0.39		140	180		28.9	30.8		0.13	0.14		0.04	0.04		0.07	0.07		0.08	0.1		1.76596	1.97436		6.38462	5.5		42
26	32.2	32.1		8	8		16.3	22.4		1.2	1.2		-2.8	-2.6		-1.8	-1.7		0.68	0.81		0.43	0.44		222	173		18.4	22.7		0.15	0.16		0.05	0.08		0.09	0.09		0.09	0.1		1.5814	1.84091		4.53333	5.0625		73
27	31.5	44.5		10.5	11.7		22.7	20.2		1	2		-2.3	-2.9		-1.9	-1.6		0.78	0.77		0.45	0.35		160	193		16.4	16.6		0.14	0.13		0.05	0.06		0.08	0.1		0.1	0.09		1.73333	2.2		5.57143	5.92308		61
28	45.5	48		9	12		11.9	14.4		1.6	1.7		-3	-3.5		-1.3	-1.5		0.73	0.86		0.31	0.35		224	197		21.6	24.8		0.16	0.16		0.03	0.05		0.07	0.09		0.09	0.08		2.35484	2.45714		4.5625	5.375		52
29	35.22	43.7		11	6.5					1.95	1.9		-1.5	-3		-1.5	-1.3		0.68	0.7		0.43	0.45		216	156		18.3	19.1		0.15	0.17		0.05	0.07		0.1	0.11		0.1	0.11		1.5814	1.55556		4.53333	4.11765		69
30
31	36.5	44.5		7	11		12.8	15.5		1.5	1.5		-2.7	-2.9		-1.3	-1.5		0.72	0.67		0.44	0.39		207	161		21.6	23.6		0.1	0.11		0.05	0.06		0.09	0.09		0.12	0.11		1.63636	1.71795		7.2	6.09091		70
32	38.2	36.2		8.5	5		12.3	15.8		1.5	1.6		-3.3	-3.5		-1.6	-1.5		0.77	0.9		0.45	0.59		206	151		19.5	20.3		0.12	0.12		0.04	0.05		0.08	0.08		0.09	0.09		1.71111	1.52542		6.41667	7.5		70
33
34	38.2	37.7		8	8.4		12.6	14.8		1.3	1.6		-2.8	-2.2		-1.2	-1.2		0.87	0.92		0.34	0.35		168	208		27.8	25		0.13	0.15		0.05	0.06		0.09	0.09		0.1	0.11		2.55882	2.62857		6.69231	6.13333		52
35	34.9	41.1		11.2	8.9		14.2	16.2		1.6	2.2		-1.85	-2.6		-1.9	-1.3		0.87	0.89		0.45	0.59		226	210		23.3	23.4		0.13	0.13		0.05	0.05		0.06	0.07		0.11	0.12		1.93333	1.50847		6.69231	6.84615		60
36	36	39.2		9.4	15		11.7	12.7		1.05	1.8		-3.2	-3		-1.35	-2.1		0.65	0.74		0.34	0.33		276	182		18.4	20.8		0.12	0.2		0.04	0.04		0.08	0.1		0.07	0.09		1.91176	2.24242		5.41667	3.7		59
37	36.6	38.6		8.9	5.9		21.7	21.6		1.5	1.7		-3	-3.1		-1.2	-1.3		0.76	0.75		0.34	0.28		208	327		24	25.9		0.15	0.16		0.05	0.04		0.12	0.11		0.11	0.1		2.23529	2.67857		5.06667	4.6875		54
38	42.7	44.5		11.8	14.5		13.4	17.3		1.45	1.5		-2.6	-2.4		-1.5	-2.3		0.63	0.62		0.34	0.29		229	192		19.4	20.9		0.16	0.15		0.06	0.06		0.12	0.1		0.11	0.1		1.85294	2.13793		3.9375	4.13333		64
39	41	47.5		9.5	12		18.9	18.5		1.6	1.8		-2.1	-3.2		-1.4	-1.6		0.93	0.92		0.34	0.35		228	147		23.3	22.4		0.13	0.17		0.05	0.06		0.09	0.08		0.14	0.12		2.73529	2.62857		7.15385	5.41176		55
40	31.9	48		12.2	12.4					1.1	1.6		-2.5	-2.9		-1.4	-2		0.68	0.69		0.43	0.41		145	166		15.8	20.4		0.12	0.13		0.06	0.06		0.07	0.08		0.1	0.1		1.5814	1.68293		5.66667	5.30769		70
[truncated: 5 more columns]

## Sheet: Passive Leg Raise Left Ventricl
Passive Leg Raise, Left Ventricle	Global Longitudinal LV Strain			Diastolic LV Strain			LV volume, enddiastolic volume (obs biplan ej analyserad, bara 4kammare)			LV Strain Rate s			LV Strain Rate e			LV Strain Rate a			LV Ejection Fraction			Doppler Mitralis E			Doppler Mitralis A			Doppler Mitralis DT (E-våg)			Doppler LVOT VTI			Tissue doppler e (LV lateral wall)			Tissue doppler a (LV lateral wall)			Tissue doppler s (LV lateral wall)			Tissue doppler s (RV free wall)			E/A			E/e
LegLift ICU	GLS LV Peter			Diastolic LV strain			LV-Volume PG			LV SR s			LV SR e			LV SR a			LV EF			LV-E			LV A			LV Mitralis DT (E-våg)			LVOT-VTI			VK e			VK a			VK s			HK s			VK E/A			VK E/e
	Baseline	During		Baseline	During		Baseline	During		Baseline	During		Baseline	During		Baseline	During		Baseline	During		Baseline	During		Baseline	During		Baseline	During		Baseline	During		Baseline	During		Baseline	During		Baseline	During		Baseline	During		Baseline	During		Baseline
n=	29	28		29	28		31	29		30	28		30	28		30	27		31	29		34	34		34	34		34	34		34	34		34	33		34	33		34	35		33	33		34	34		34
mean	-17.1828	-17.8071		-3.30862	-3.19179		100.323	104.034		-0.975333	-0.961429		1.558	1.64071		0.444	0.47963		52.4839	55.4483		0.784412	0.804412		0.383529	0.386765		200.912	193.176		20.4382	21.8706		0.136765	0.145758		0.0523529	0.0584848		0.0888235	0.0908571		0.0975758	0.0975758		2.10984	2.13926		5.90946
SD	1.59711	2.28812		1.53396	2.19963		23.0368	23.6937		0.10881	0.154745		0.279697	0.328824		0.123501	0.134121		5.32836	5.55226		0.126974	0.12238		0.0738501	0.0765831		40.4455	36.9983		3.51628	3.14994		0.0279307	0.0223649		0.0115624	0.0132574		0.0177123	0.0165158		0.0154172	0.012755		0.510166	0.46896		1.30876
SEM	0.296576	0.432414		0.28485	0.415691		4.13752	4.39981		0.0198658	0.0292441		0.0510654	0.0621419		0.022548	0.0258115		0.957001	1.03103		0.0217758	0.020988		0.0126652	0.0131339		6.93635	6.34516		0.603038	0.540211		0.00479008	0.00389323		0.00198294	0.00230781		0.00303763	0.00279169		0.00268379	0.00222036		0.0874927	0.080426		0.224451
95%CI	0.607509	0.887241		0.583489	0.852927		8.44995	9.0126		0.0406302	0.0600039		0.104441	0.127505		0.0461159	0.0530563		1.95446	2.11197		0.0443033	0.0427005		0.0257675	0.0267211		14.1121	12.9093		1.22689	1.09907		0.00974549	0.00793025		0.00403432	0.00470086		0.00618011	0.00567339		0.00546669	0.00452272		0.178005	0.163628		0.456649
min	-21	-23.5		-6.2	-5.6		72	76		-1.15	-1.3		0.95	0.86		0.3	0.2		41	48		0.53	0.58		0.29	0.28		130	127		14	14.5		0.08	0.09		0.03	0.04		0.06	0.05		0.07	0.07		1.39474	1.38095		3.9375
max	-14	-14		2.7	3.75		177	166		-0.8	-0.75		2.1	2.4		0.8	0.7		61	69		1.06	1.04		0.58	0.59		296	327		28.9	30.8		0.21	0.2		0.08	0.09		0.12	0.12		0.14	0.12		3.33333	3.58621		9.625
T-Test	0.0936692			0.756923			0.215078			0.573155			0.234339			0.360145			0.0123289			0.183184			0.809723			0.320859			0.000119718			0.0344779			0.00190442			0.350633			0.878786			0.725339			0.124766
	Baseline	During		Baseline	During		Baseline	During		Baseline	During		Baseline	During		Baseline	During		Baseline	During		Baseline	During		Baseline	During		Baseline	During		Baseline	During		Baseline	During		Baseline	During		Baseline	During		Baseline	During		Baseline	During		Baseline
	Peter	Peter		Peter	Peter		Peter	Peter		Peter	Peter		Peter	Peter		Peter	Peter		Peter	Peter		Peter	Peter		Peter	Peter		Peter	Peter		Peter	Peter		Peter	Peter		Peter	Peter		Peter	Peter		Peter	Peter		Peter	Peter		Peter
3		-17.3			-2.1		99	121		-0.9	-0.88		1.36	1.84		0.42	0.28		44	57		0.95	0.88		0.51	0.33		148	198		17.6	20		0.19	0.18		0.05	0.05		0.11	0.11		0.1	0.1		1.86275	2.66667		5
4	-16.5	-15		-2.5	-3.75		128	101		-0.96	-0.8		1.42	0.86		0.35	0.5		52	55		0.9	0.62		0.31	0.34		150	150		19	25		0.16	0.13		0.07	0.06		0.11	0.11		0.1	0.1		2.90323	1.82353		5.625
5							102	118											56	49		0.53	0.58		0.38	0.42		175	188		16.4	20.5		0.1	0.12		0.05	0.05		0.08	0.09		0.07	0.09		1.39474	1.38095		5.3
6	-15.6	-18.8		-1.7	3.75		101	98		-0.9	-0.93		1.45	1.65		0.3	0.5		50	61		0.73	0.73		0.32	0.32		209	209		24.7	22.9		0.15	0.15		0.05	0.05		0.09	0.08		0.1	0.09		2.28125	2.28125		4.86667
7	-18.6	-19.1		-4.4	-3.6		100	122		-1	-1		2	1.6		0.5	0.44		57	61		0.64	0.63		0.38	0.36		228	249		16.2	20.4		0.11	saknas		0.05	saknas		0.09	saknas		0.1	saknas		1.68421	1.75		5.81818
8	-16.1	-19.5		2.7	3.7		112	154		-0.8	-0.85		1.5	2.1		0.3	0.4		58	69		1.06	1.04		0.42	0.29		192	162		24.4	25.1		0.16	0.16		0.04	0.05		0.08	0.09		0.09	0.09		2.52381	3.58621		6.625
9	-16.5	-16.3		-3.3	-4.22		84	82		-0.8	-0.86		1.5	1.45		0.4	0.63		41	48		0.67	0.89		0.29	0.37		239	180		14.9	16.4		0.1	0.12		0.04	0.04		0.07	0.06		0.07	0.08		2.31034	2.40541		6.7
10							Dålig bild																																	0.08	0.07
11	-17.1	-16		-4.2	-5.1		72	83		-1.1	-0.9		1.3	1.4		0.6	0.7		61	65		0.94	1.04		0.58	0.52		157	171		21.4	23.4		0.11	0.12		0.07	0.09		0.11	0.1		0.11	0.1		1.62069	2		8.54545
12	-14	-14		-2.35	-1.9		117	121		-0.8	-0.8		1.31	1.3		0.3	0.3		51	53																				0.07	0.08
13																						0.93	0.98		0.32	0.39		234	193		17.4	18.1		0.14	0.14		0.06	0.06		0.11	0.1		dålig bild	0.11		2.90625	2.51282		6.64286
14	-19	-19.9		-3.75	-3.4		177	166		-1.1	-1.1		1.4	2		0.4	0.7		58	52		0.69	0.76		0.39	0.36		182	200		17.3	19.7		0.16	0.16		0.07	0.06		dålig bild	0.11		0.11	0.09		1.76923	2.11111		4.3125
15
16
17	-19.2	-19.8		-3.45	-3.45		87	91		-1.1	-1.15		2	2.1		0.4	0.4		51	50		0.91	0.93		0.3	0.39		180	173		24.3	24.3		0.17	0.16		0.05	0.07		0.08	0.09		0.11	0.12		3.03333	2.38462		5.35294
18	-17	-18.5		-4.8	-5.6		86	dålig bild		-0.9	-0.95		1.2	1.44		0.6	0.45		52	dålig bild		0.81	0.8		0.55	0.5		162	218		22.7	22.8		0.11	0.15		0.07	0.08		db	0.08		0.08	0.07		1.47273	1.6		7.36364
19	-18.1	-16.1		-6.2	-4.5		111	107		-0.9	-1		0.95	1.5		0.8	0.6		43	61		0.59	0.6		0.36	0.35		296	229		20	21		0.12	0.15		0.06	0.06		0.1	0.12		0.11	0.12		1.63889	1.71429		4.91667
20	-16	-15.8		-3.3	-5		80	79		-0.95	-1		1.7	1.5		0.4			46	55		0.74	0.8		0.36	0.4		197	202		21.4	20.5		0.14	0.14		0.08	0.08		0.12	0.12		0.11	0.1		2.05556	2		5.28571
21																						0.77	0.88		0.37	0.32		185	190		14	14.5		0.08	0.09		0.03	0.05		0.06	0.05		0.07	0.08		2.08108	2.75		9.625
22							84	85											52	55		0.68	0.74		0.34	0.37		130	127		20.8	19.9		0.11	0.13		0.06	0.08		0.09	0.08		0.1	0.08		2	2		6.18182
23	-17.7	-16.3		-3.4	-3.1		96	91		-1	-0.8		1.9	1.5		0.5	0.5		54	58		0.89	0.83		0.38	0.33		274	250		22.2	25.8		0.21	0.17		0.05	0.06		0.09	0.1		0.09	0.09		2.34211	2.51515		4.2381
24	-17.3	-18.1		-2.2	-3.7		98	111		-0.9	-0.8		1.5	1.4		0.3	0.3		53	63		1	0.91		0.3	0.49		185	223		22	22.7		0.12	0.14		0.06	0.05		0.08	0.09		0.1	0.1		3.33333	1.85714		8.33333
25	-15.5	-15.2		-3	-2.8		81	91		-0.8	-0.9		1.8	1.2		0.35	0.35		51	48		0.83	0.77		0.47	0.39		140	180		28.9	30.8		0.13	0.14		0.04	0.04		0.07	0.07		0.08	0.1		1.76596	1.97436		6.38462
26	-15.7	-18.6		-2	-4.4		128	131		-1.1	-1		1.8	1.6		0.4	0.5		58	53		0.68	0.81		0.43	0.44		222	173		18.4	22.7		0.15	0.16		0.05	0.08		0.09	0.09		0.09	0.1		1.5814	1.84091		4.53333
27	-19.6	-17.7		-3.6	-4.8		går ej analysera			-1	-0.92		1.45	1.5		0.45	0.6		går ej analysera			0.78	0.77		0.45	0.35		160	193		16.4	16.6		0.14	0.13		0.05	0.06		0.08	0.1		0.1	0.09		1.73333	2.2		5.57143
28	-15.9	-15.5		-3.3	-1.6		88	90		-1.1	-0.8		1.3	1.8		0.4	0.2		52	55		0.73	0.86		0.31	0.35		224	197		21.6	24.8		0.16	0.16		0.03	0.05		0.07	0.09		0.09	0.08		2.35484	2.45714		4.5625
29	-17			-3			74	76		-1			1.3			0.3			53	64		0.68	0.7		0.43	0.45		216	156		18.3	19.1		0.15	0.17		0.05	0.07		0.1	0.11		0.1	0.11		1.5814	1.55556		4.53333
30	-16.5	-21.1		-2.5	-2.8					-0.9	-1.23		1.9	2.4		0.3	0.5					0.9	0.88		0.33	0.35		239	226		20.3	21.3		0.17	0.16		0.06	0.07		0.12	0.11		0.1	0.1		2.72727	2.51429		5.29412
31	-18.1	-18.1		-4.7	-4		86	82		-1.1	-1		1.5	1.9		0.65	0.6		57	54		0.72	0.67		0.44	0.39		207	161		21.6	23.6		0.1	0.11		0.05	0.06		0.09	0.09		0.12	0.11		1.63636	1.71795		7.2
32	-17.1	-16		-2.8	-4.5		90	100		-1.1	-0.9		1.8	1.5		0.5	0.55		48	51		0.77	0.9		0.45	0.59		206	151		19.5	20.3		0.12	0.12		0.04	0.05		0.08	0.08		0.09	0.09		1.71111	1.52542		6.41667
33							95	97											50	51		0.76	0.82		0.29	0.39		214	187		21.2	22.6		0.15	0.16		0.04	0.04		0.07	0.08		0.09	0.09		2.62069	2.10256		5.06667
34	-16.4	-21.3		-4.6	-3.5		104	99		-1.05	-1.1		1.7	1.8		0.6	0.4		60	59		0.87	0.92		0.34	0.35		168	208		27.8	25		0.13	0.15		0.05	0.06		0.09	0.09		0.1	0.11		2.55882	2.62857		6.69231
35	-21	-20.2		-4.2	-3.8		96	80		-1.15	-1.3		2.1	1.9		0.6	0.4		43	48		0.87	0.89		0.45	0.59		226	210		23.3	23.4		0.13	0.13		0.05	0.05		0.06	0.07		0.11	0.12		1.93333	1.50847		6.69231
36	-19.8			-3.2			93	98		-0.9			1.9			0.4			55	51		0.65	0.74		0.34	0.33		276	182		18.4	20.8		0.12	0.2		0.04	0.04		0.08	0.1		0.07	0.09		1.91176	2.24242		5.41667
37	-14.8	-15.2		-3	-3		159	154		-0.85	-0.75		1.5	1.4		0.4	0.4		48	51		0.76	0.75		0.34	0.28		208	327		24	25.9		0.15	0.16		0.05	0.04		0.12	0.11		0.11	0.1		2.23529	2.67857		5.06667
38	-16.9	-23.5		-5	-5.6		76	85		-1	-1.3		1.3	2.1		0.4	0.7		57	56		0.63	0.62		0.34	0.29		229	192		19.4	20.9		0.16	0.15		0.06	0.06		0.12	0.1		0.11	0.1		1.85294	2.13793		3.9375
39	-18.8	-19.5		-4.3	-3		111	104		-1.1	-1.1		1.6	1.8		0.5	0.6		59	55		0.93	0.92		0.34	0.35		228	147		23.3	22.4		0.13	0.17		0.05	0.06		0.09	0.08		0.14	0.12		2.73529	2.62857		7.15385
40	-16.5	-16.2		-3.9	-3.6		95			-1	-0.8		1.3	1.4		0.5	0.45		57			0.68	0.69		0.43	0.41		145	166		15.8	20.4		0.12	0.13		0.06	0.06		0.07	0.08		0.1	0.1		1.5814	1.68293		5.66667
[truncated: 2 more columns]

## Sheet: Participant data
Participant data		Mean Age	Mean Weight	Mean Length	Mean BMI	Mean excercise
	20 male (man)	25.2895	74.8684	177.368	23.7584	2.68421
	18 female (kvinna)
Person	Gender	Age (year)	Weight (kg)	Length (cm)	BMI	Excercise level, 1-4 4 is very active
3	Man	24	75	176	24.2123	3
4	Man	24	74	177	23.6203	3
5	Man	25	82	180	25.3086	2
6	Kvinna	27	77	181	23.5036	3
7	Man	38	74	187	21.1616	3
8	Man	24	84	180	25.9259	3
9	Man	25	75	180	23.1481	2
10	Man	24	83	187	23.7353	2
11	Man	27	72	174	23.7812	1
12	Man	24	73	175	23.8367	3
13	Man	22	80	185	23.3747	3
14	Man	24	87	187	24.8792	3
15	Kvinna	30	65	170	22.4913	2
16	Kvinna	23	67	163	25.2174	3
17	Kvinna	23	75	170	25.9516	3
18	Kvinna	23	73	176	23.5666	3
19	Man	25	80	182	24.1517	2
20	Man	26	75	183	22.3954	3
21	Man	23	85	183	25.3815	2
22	Man	23	72	180	22.2222	1
23	Kvinna	24	70	176	22.5981	4
24	Kvinna	24	80	175	26.1224	3
25	Kvinna	24	62	175	20.2449	3
26	Man	21	87	187	24.8792	3
27	Man	28	84	187	24.0213	3
28	Kvinna	23	69	170	23.8754	3
29	Kvinna	28	63	169	22.0581	3
30	kvinna	22	58	170	20.0692	2
31	kvinna	32	63	167	22.5896	3
32	man	22	75	178	23.6713	3
33	kvinna	24	75	173	25.0593	3
34	kvinna	27	65	170	22.4913	2
35	kvinna	21	77	178	24.3025	3
36	Kvinna	31	87	169	30.4611	3
37	man	21	85	193	22.8194	3
38	kvinna	30	55	166	19.9594	3
39	kvinna	30	79	177	25.2163	3
40	man	25	83	184	24.5156	2
